# Supplementary material for: Synthesis and characterization of a germanium bismethanediide complex
Source: Royal Society of Chemistry journal article supplement (doi:10.1039/b911384c), 2009-01-01
Supplement: b911384c.pdf [file b911384c.pdf]

## Synthesis and characterization of a germanium bismethanediide complex

Cechao Foo,<sup>a</sup> Kai-Chung Lau<sup>b</sup>, Yi-Fan Yang,<sup>a</sup> and Cheuk-Wai So<sup>\*a</sup>

<sup>a</sup>Division of Chemistry and Biological Chemistry, School of Physical and Mathematical Sciences, Nanyang Technological University, Singapore. <sup>b</sup>Department of Biology and Chemistry, City University of Hong Kong, Tat Chee Avenue, Kowloon, Hong Kong. E-mail: CWSO@ntu.edu.sg

### Electronic Supplementary Information

#### **Content:**

1. Table S1. Individual hybrid contributions, NLMO/NPA bond orders and Wiberg index of the Ge(1)–C(1), C(1)–P(2), P(2)–S(2), Ge(1)–S(2) and C(1)–P(1) bonds in compound **2**.
2. Complete citation for reference 18
3. Cartesian coordinates for compound **2**
4. Cartesian coordinates for compound **2A**
5. Cartesian coordinates for compound **2B**

**Table S1.** Individual hybrid contributions, NLMO/NPA bond orders and Wiberg index of the Ge(1)–C(1), C(1)–P(2), P(2)–S(2), Ge(1)–S(2) and C(1)–P(1) bonds in compound **2**

| Bond       | NLMO/NPA bond order | MO(1) | Contr. % | Type (contr. %) <sup>a</sup>         | MO(2) | Contr. % | Type (contr. %) <sup>a</sup>         | Wiberg index |
|------------|---------------------|-------|----------|--------------------------------------|-------|----------|--------------------------------------|--------------|
| Ge(1)–C(1) | 0.624               | Ge    | 28.2     | s (35.1)<br>p <sup>1.85</sup> (64.8) | C     | 71.8     | s (31.0)<br>p <sup>2.22</sup> (69.0) | 0.858        |
| C(1)–P(2)  | 0.835               | C     | 61.1     | s (30.7)<br>p <sup>2.26</sup> (69.3) | P     | 38.9     | s (30.2)<br>p <sup>2.29</sup> (69.1) | 1.051        |
| P(2)–S(2)  | 0.907               | P     | 44.8     | s (19.3)<br>p <sup>4.14</sup> (79.6) | S     | 55.2     | s (13.6)<br>p <sup>6.33</sup> (86.0) | 1.019        |
| Ge(1)–S(2) | 0.494               | Ge    | 25.7     | s (15.2)<br>p <sup>5.50</sup> (83.4) | S     | 74.3     | s (14.0)<br>p <sup>6.12</sup> (85.8) | 0.671        |
| C(1)–P(1)  | 0.727               | C     | 64.0     | s (37.5)<br>p <sup>1.67</sup> (62.5) | P     | 36.0     | s (26.4)<br>p <sup>2.76</sup> (72.8) | 0.902        |

<sup>a</sup> The individual hybrid contribution may not sum up to 100% as the contribution from the d-type orbital is not listed

## 2. Complete citation for reference 18

18. Gaussian 03, Revision D.01, M. J. Frisch, G. W. Trucks, H. B. Schlegel, G. E. Scuseria, M. A. Robb, J. R. Cheeseman, J. A. Montgomery, Jr., T. Vreven, K. N. Kudin, J. C. Burant, J. M. Millam, S. S. Iyengar, J. Tomasi, V. Barone, B. Mennucci, M. Cossi, G. Scalmani, N. Rega, G. A. Petersson, H. Nakatsuji, M. Hada, M. Ehara, K. Toyota, R. Fukuda, J. Hasegawa, M. Ishida, T. Nakajima, Y. Honda, O. Kitao, H. Nakai, M. Klene, X. Li, J. E. Knox, H. P. Hratchian, J. B. Cross, V. Bakken, C. Adamo, J. Jaramillo, R. Gomperts, R. E. Stratmann, O. Yazyev, A. J. Austin, R. Cammi, C. Pomelli, J. W. Ochterski, P. Y. Ayala, K. Morokuma, G. A. Voth, P. Salvador, J. J. Dannenberg, V. G. Zakrzewski, S. Dapprich, A. D. Daniels, M. C. Strain, O. Farkas, D. K. Malick, A. D. Rabuck, K. Raghavachari, J. B. Foresman, J. V. Ortiz, Q. Cui, A. G. Baboul, S. Clifford, J. Cioslowski, B. B. Stefanov, G. Liu, A. Liashenko, P. Piskorz, I. Komaromi, R. L. Martin, D. J. Fox, T. Keith, M. A. Al-Laham, C. Y. Peng, A. Nanayakkara, M. Challacombe, P. M. W. Gill, B. Johnson, W. Chen, M. W. Wong, C. Gonzalez, J. A. Pople, Gaussian, Inc., Wallingford CT, **2004**.

## 3. Cartesian coordinates for compound **2**

|    |           |           |           |
|----|-----------|-----------|-----------|
| Ge | 0.000000  | 0.000000  | 0.487057  |
| S  | -1.847249 | 0.470372  | 1.910268  |
| S  | 1.847249  | -0.470372 | 1.910268  |
| C  | 1.048974  | 1.444964  | -0.127832 |
| C  | -1.048974 | -1.444964 | -0.127832 |
| P  | -2.461568 | -1.249246 | 0.884003  |
| P  | 2.461568  | 1.249246  | 0.884003  |
| P  | -0.711406 | -2.883394 | -1.111218 |
| P  | 0.711406  | 2.883394  | -1.111218 |
| S  | 2.305330  | 3.563187  | -2.103397 |
| S  | -2.305330 | -3.563187 | -2.103397 |
| C  | 2.810696  | 2.603709  | 2.067924  |
| C  | 3.502626  | 3.741452  | 1.617814  |
| C  | 2.349425  | 2.549007  | 3.391291  |
| C  | 3.732915  | 4.805953  | 2.490523  |
| H  | 3.844664  | 3.803354  | 0.588715  |
| C  | 2.593757  | 3.613805  | 4.261763  |
| H  | 1.812172  | 1.672774  | 3.742222  |
| C  | 3.283986  | 4.742855  | 3.812960  |
| H  | 4.262373  | 5.685242  | 2.133406  |
| H  | 2.243022  | 3.559258  | 5.289204  |

|   |           |           |           |
|---|-----------|-----------|-----------|
| H | 3.471161  | 5.571546  | 4.491199  |
| C | -2.810696 | -2.603709 | 2.067924  |
| C | -3.502626 | -3.741452 | 1.617814  |
| C | -2.349425 | -2.549007 | 3.391291  |
| C | -3.732915 | -4.805953 | 2.490523  |
| H | -3.844664 | -3.803354 | 0.588715  |
| C | -2.593757 | -3.613805 | 4.261763  |
| H | -1.812172 | -1.672774 | 3.742222  |
| C | -3.283986 | -4.742855 | 3.812960  |
| H | -4.262373 | -5.685242 | 2.133406  |
| H | -2.243022 | -3.559258 | 5.289204  |
| H | -3.471161 | -5.571546 | 4.491199  |
| C | 4.059652  | 0.913332  | 0.067834  |
| C | 4.112908  | 0.642774  | -1.303914 |
| C | 5.236906  | 0.884266  | 0.834237  |
| C | 5.341512  | 0.367396  | -1.908824 |
| H | 3.206519  | 0.676039  | -1.896532 |
| C | 6.458564  | 0.594444  | 0.227011  |
| H | 5.204669  | 1.094975  | 1.899918  |
| C | 6.512249  | 0.341736  | -1.148241 |
| H | 5.379960  | 0.179933  | -2.978368 |
| H | 7.366524  | 0.573647  | 0.824075  |
| H | 7.466443  | 0.129363  | -1.624116 |
| C | -4.059652 | -0.913332 | 0.067834  |
| C | -4.112908 | -0.642774 | -1.303914 |
| C | -5.236906 | -0.884266 | 0.834237  |
| C | -5.341512 | -0.367396 | -1.908824 |
| H | -3.206519 | -0.676039 | -1.896532 |
| C | -6.458564 | -0.594444 | 0.227011  |
| H | -5.204669 | -1.094975 | 1.899918  |
| C | -6.512249 | -0.341736 | -1.148241 |
| H | -5.379960 | -0.179933 | -2.978368 |
| H | -7.366524 | -0.573647 | 0.824075  |
| H | -7.466443 | -0.129363 | -1.624116 |
| C | 0.000000  | 4.218971  | -0.047664 |
| C | -0.005885 | 5.539452  | -0.523943 |
| C | -0.547433 | 3.946636  | 1.211707  |
| C | -0.561081 | 6.564582  | 0.243394  |
| H | 0.444293  | 5.761153  | -1.487609 |
| C | -1.100230 | 4.973723  | 1.982575  |
| H | -0.543624 | 2.932186  | 1.593496  |
| C | -1.111776 | 6.283325  | 1.498450  |
| H | -0.559171 | 7.583359  | -0.136361 |
| H | -1.519969 | 4.746255  | 2.959382  |
| H | -1.540810 | 7.082645  | 2.097858  |
| C | 0.000000  | -4.218971 | -0.047664 |
| C | 0.005885  | -5.539452 | -0.523943 |
| C | 0.547433  | -3.946636 | 1.211707  |
| C | 0.561081  | -6.564582 | 0.243394  |
| H | -0.444293 | -5.761153 | -1.487609 |
| C | 1.100230  | -4.973723 | 1.982575  |
| H | 0.543624  | -2.932186 | 1.593496  |
| C | 1.111776  | -6.283325 | 1.498450  |
| H | 0.559171  | -7.583359 | -0.136361 |
| H | 1.519969  | -4.746255 | 2.959382  |
| H | 1.540810  | -7.082645 | 2.097858  |

|   |           |           |           |
|---|-----------|-----------|-----------|
| C | 0.681084  | -2.434279 | -2.232393 |
| C | 0.378950  | -1.821064 | -3.456999 |
| C | 2.014597  | -2.742258 | -1.926694 |
| C | 1.395759  | -1.520116 | -4.363200 |
| H | -0.656535 | -1.607014 | -3.704367 |
| C | 3.029953  | -2.450208 | -2.842272 |
| H | 2.266793  | -3.229030 | -0.989777 |
| C | 2.723244  | -1.840529 | -4.060398 |
| H | 1.151056  | -1.050096 | -5.312615 |
| H | 4.058916  | -2.701399 | -2.599383 |
| H | 3.512491  | -1.621268 | -4.775593 |
| C | -0.681084 | 2.434279  | -2.232393 |
| C | -0.378950 | 1.821064  | -3.456999 |
| C | -2.014597 | 2.742258  | -1.926694 |
| C | -1.395759 | 1.520116  | -4.363200 |
| H | 0.656535  | 1.607014  | -3.704367 |
| C | -3.029953 | 2.450208  | -2.842272 |
| H | -2.266793 | 3.229030  | -0.989777 |
| C | -2.723244 | 1.840529  | -4.060398 |
| H | -1.151056 | 1.050096  | -5.312615 |
| H | -4.058916 | 2.701399  | -2.599383 |
| H | -3.512491 | 1.621268  | -4.775593 |

#### 4. Cartesian coordinates for compound **2A**

|    |           |           |           |
|----|-----------|-----------|-----------|
| Ge | 0.000000  | 0.000000  | 0.538749  |
| S  | 1.217306  | 1.512274  | 1.900323  |
| S  | -1.217306 | -1.512274 | 1.900323  |
| C  | 0.789799  | -1.533309 | -0.201040 |
| C  | -0.789799 | 1.533309  | -0.201040 |
| P  | 0.000000  | 2.753041  | 0.732784  |
| H  | -0.777814 | 3.580879  | 1.569603  |
| H  | 0.792674  | 3.697615  | 0.050491  |
| P  | 0.000000  | -2.753041 | 0.732784  |
| H  | 0.777814  | -3.580879 | 1.569603  |
| H  | -0.792674 | -3.697615 | 0.050491  |
| P  | -1.994236 | 1.953672  | -1.409731 |
| H  | -1.666066 | 1.256681  | -2.599710 |
| H  | -3.202893 | 1.289590  | -1.080692 |
| P  | 1.994236  | -1.953672 | -1.409731 |
| H  | 1.666066  | -1.256681 | -2.599710 |
| H  | 3.202893  | -1.289590 | -1.080692 |
| S  | 2.160495  | -3.925252 | -1.600276 |
| S  | -2.160495 | 3.925252  | -1.600276 |

#### 5. Cartesian coordinates for compound **2B**

|    |           |           |           |
|----|-----------|-----------|-----------|
| Ge | 0.000000  | 0.000000  | 0.000101  |
| S  | 2.517844  | 0.373135  | -0.003338 |
| S  | -2.517844 | -0.373135 | -0.003338 |
| P  | 1.696738  | 2.253548  | -0.002641 |
| H  | 2.133784  | 3.020605  | -1.099758 |
| H  | 2.138009  | 3.021179  | 1.092367  |
| P  | -1.696738 | -2.253548 | -0.002641 |
| H  | -2.138009 | -3.021179 | 1.092367  |
| H  | -2.133784 | -3.020605 | -1.099758 |

|   |           |           |           |
|---|-----------|-----------|-----------|
| C | 0.000000  | 1.852380  | 0.000776  |
| C | 0.000000  | -1.852380 | 0.000776  |
| P | -1.274954 | 3.085613  | 0.003980  |
| H | -2.140909 | 2.795396  | -1.077258 |
| H | -2.134807 | 2.795819  | 1.090149  |
| P | 1.274954  | -3.085613 | 0.003980  |
| H | 2.140909  | -2.795396 | -1.077258 |
| H | 2.134807  | -2.795819 | 1.090149  |
| S | -0.492235 | 4.908776  | 0.001346  |
| S | 0.492235  | -4.908776 | 0.001346  |
